# Supplementary material for: Total synthesis and preliminary SAR study of (±)-merochlorins A and B
Source: Royal Society of Chemistry journal article supplement (doi:10.1039/c5ob01946j), 2015-10-14
Supplement: c5ob01946j1.pdf [file c5ob01946j1.pdf]

## Supporting Information

### Total Synthesis and Preliminary SAR Study of (±)-Merochlorins A and B

Hongzhi Yang,<sup>a</sup> Xue Liu,<sup>b</sup> Qingong Li,<sup>a</sup> Longbo Li,<sup>a</sup> Jingren Zhang,<sup>\*,b,c</sup> and Yefeng Tang<sup>\*,a,b</sup>

<sup>a</sup>Comprehensive AIDS Research Center, Department of Pharmacology & Pharmaceutical Sciences, School of Medicine, Tsinghua University, Beijing, 100084, China

<sup>b</sup>Department of Basic Medical Sciences, School of Medicine, Tsinghua University, Beijing 100084, China

<sup>c</sup>Collaborative Innovation Center for Biotherapy, State Key Laboratory of Biotherapy and Cancer Center, West China Hospital, West China Medical School, Sichuan University, Chengdu 610041, China

#### Table of Contents

|                                                                             |       |
|-----------------------------------------------------------------------------|-------|
| <b>I:</b> Comparison of NMR Data of Natural and Synthetic Merochlorins..... | 2-5   |
| <b>II:</b> NMR Spectrum.....                                                | 6-16  |
| <b>III:</b> X-ray Crystallographic Study.....                               | 17-18 |

## I: Comparison of NMR Data of Natural and Synthetic Merochlorins

Note: Some of the NMR data of natural product **1** and **2** were misreported in the original isolation paper, which have been corrected in the following synthetic work by George<sup>1</sup> and Trauner,<sup>2</sup> respectively. The NMR data of our samples are in good agreement with those reported in reference 1 and 2.

### 1) Merochlorin A

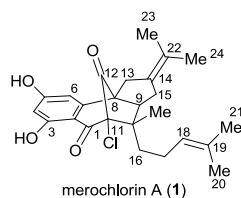

| No.  | <sup>1</sup> H NMR δ <sub>H</sub> [ppm, mult, J (Hz)] d <sub>6</sub> -DMSO |                                               |                                               |
|------|----------------------------------------------------------------------------|-----------------------------------------------|-----------------------------------------------|
|      | Natural (600 MHz)                                                          | Synthetic (Ref.1)<br>(400 MHz)                | Synthetic (This work)<br>(400 MHz)            |
| 1    |                                                                            |                                               |                                               |
| 2    |                                                                            |                                               |                                               |
| 4    | 6.16, d (2.0)                                                              | 6.28, d (2.0)                                 | 6.28, d (2.0)                                 |
| 5    |                                                                            |                                               |                                               |
| 6    | 6.38, d (2.0)                                                              | 6.46, d (2.0)                                 | 6.46, d (2.0)                                 |
| 7    |                                                                            |                                               |                                               |
| 8    |                                                                            |                                               |                                               |
| 9    | 2.24, dd (9.4, 4.0)                                                        | 2.33, dd (9.1, 4.2)                           | 2.33, dd (8.1, 4.5)                           |
| 12   |                                                                            |                                               |                                               |
| 13   | 2.87, d (13.0); 2.65,<br>d(13.0)                                           | 2.95, d (15.2);<br>2.73, d (15.2)             | 2.95, d (15.2);<br>2.73, d (15.2)             |
| 14   |                                                                            |                                               |                                               |
| 15   | 2.36, dd (14.0, 4.0);<br>2.33, dd (14.0, 9.4)                              | 2.45-2.38, m                                  | 2.46-2.38, m                                  |
| 16   | 1.14, q (6.0);<br>1.40, dt (14.8, 4.8)                                     | 1.20, dt (13.2, 4.9);<br>1.47, dt (13.2, 4.9) | 1.20, dt (12.9, 4.1);<br>1.46, dt (13.4, 4.9) |
| 17   | 2.03, m; 1.75m                                                             | 2.10, m; 1.83, m                              | 2.10, m; 1.83, m                              |
| 18   | 4.92, t (6.5)                                                              | 5.01, t (7.1)                                 | 5.01, t (7.1)                                 |
| 19   |                                                                            |                                               |                                               |
| 20   | 1.45, s                                                                    | 1.54, s                                       | 1.54, s                                       |
| 21   | 1.53, s                                                                    | 1.61, s                                       | 1.61, s                                       |
| 22   | 1.56, s                                                                    | 1.63, s                                       | 1.63, s                                       |
| 23   |                                                                            |                                               |                                               |
| 24   | 1.65, s                                                                    | 1.73, s                                       | 1.73, s                                       |
| 25   | 0.81, s                                                                    | 0.88, s                                       | 0.88, s                                       |
| 3-OH | 11.9, br, s                                                                | 12.00, br, s                                  | 11.99, br, s                                  |
| 5-OH |                                                                            | 11.35, br, s                                  | 11.36, br, s                                  |

Ref 1: J. P. Pepper and J. H. George, *Angew. Chem. Int. Ed.*, 2013, **52**, 1-5.

Ref 2: R. Meier, S. Strych, D. Trauner, *Org. Lett.*, 2014, **16**, 2634-2637.

---

| No.  | <sup>13</sup> C NMR δ <sub>c</sub> [ppm] <i>d</i> <sub>6</sub> -DMSO |                                |                                    |
|------|----------------------------------------------------------------------|--------------------------------|------------------------------------|
|      | Natural<br>(150 MHz)                                                 | Synthetic (Ref.1)<br>(100 MHz) | Synthetic (This work)<br>(100 MHz) |
| 1    | 193.2                                                                | 193.0                          | 193.0                              |
| 2    | 109.8                                                                | 109.6                          | 109.6                              |
| 3    | 165.4                                                                | 165.8                          | 165.8                              |
| 4    | 102.1                                                                | 101.8                          | 101.8                              |
| 5    | 166.5                                                                | 166.6                          | 166.6                              |
| 6    | 103.7                                                                | 103.3                          | 103.3                              |
| 7    | 150.5                                                                | 150.3                          | 150.3                              |
| 8    | 61.5                                                                 | 61.3                           | 61.3                               |
| 9    | 58.8                                                                 | 58.1                           | 58.1                               |
| 10   | 45.3                                                                 | 45.1                           | 45.1                               |
| 11   | 91.3                                                                 | 91.0                           | 91.0                               |
| 12   | 200.1                                                                | 199.8                          | 199.8                              |
| 13   | 29.3                                                                 | 29.0                           | 29.0                               |
| 14   | 132.1                                                                | 132.4                          | 132.4                              |
| 15   | 31.9                                                                 | 31.9                           | 31.7                               |
| 16   | 39.2                                                                 | 39.4                           | 39.4                               |
| 17   | 22.8                                                                 | 22.6                           | 22.5                               |
| 18   | 124.2                                                                | 124.3                          | 124.3                              |
| 19   | 131.6                                                                | 131.6                          | 131.6                              |
| 20   | 18.1                                                                 | 17.9                           | 17.9                               |
| 21   | 26.1                                                                 | 25.8                           | 25.8                               |
| 22   | 20.9                                                                 | 21.0                           | 21.0                               |
| 23   | 123.1                                                                | 123.0                          | 123.0                              |
| 24   | 21.1                                                                 | 21.3                           | 21.3                               |
| 25   | 16.5                                                                 | 16.5                           | 16.5                               |
| 3-OH |                                                                      |                                |                                    |
| 5-OH |                                                                      |                                |                                    |

---

## 1) Merochlorin B

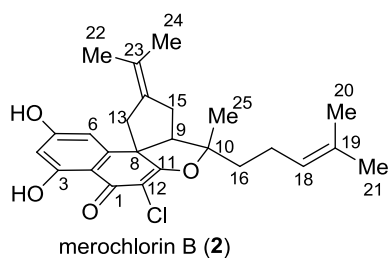

|      | <sup>1</sup> H NMR δ <sub>H</sub> [ppm, mult, <i>J</i> (Hz)] <i>d</i> <sub>6</sub> -DMSO |                                   |                                    |
|------|------------------------------------------------------------------------------------------|-----------------------------------|------------------------------------|
|      | Natural<br>(600 MHz)                                                                     | Synthetic (Ref.2)<br>(400 MHz)    | Synthetic (This work)<br>(400 MHz) |
| 1    |                                                                                          |                                   |                                    |
| 2    |                                                                                          |                                   |                                    |
| 3    |                                                                                          |                                   |                                    |
| 4    | 6.17, d (2.0)                                                                            | 6.18, d (2.1)                     | 6.18, d (2.0)                      |
| 5    |                                                                                          |                                   |                                    |
| 6    | 6.15, d (2.0)                                                                            | 6.16, d (2.2)                     | 6.16, d (2.0)                      |
| 7    |                                                                                          |                                   |                                    |
| 8    |                                                                                          |                                   |                                    |
| 9    | 2.99, d (7.8)                                                                            | 3.00, d (7.9)                     | 2.99, d (7.6)                      |
| 10   |                                                                                          |                                   |                                    |
| 11   |                                                                                          |                                   |                                    |
| 12   |                                                                                          |                                   |                                    |
| 13   | 2.81, d (17.0);<br>2.47, d(17.0)                                                         | 2.82, d (18.6);<br>2.48, d (18.2) | 2.81, d (18.4);<br>2.47, d (18.3)  |
| 14   |                                                                                          |                                   |                                    |
| 15   | 2.82, d (17.8);<br>2.70, d (17.8)                                                        | 2.89, d (18.6);<br>2.73, d (18.6) | 2.85, d (18.6);<br>2.72, d (17.9)  |
| 16   | 1.73-1.74, m                                                                             | 1.77-1.71, m                      | 1.76-1.71, m                       |
| 17   | 1.99, m; 1.74, m                                                                         | 2.04-1.93, m                      | 2.04-1.93, m                       |
| 18   | 5.05, t (7.5)                                                                            | 5.05, t (7.0)                     | 5.05, t (6.6)                      |
| 19   |                                                                                          |                                   |                                    |
| 20   | 1.48, s                                                                                  | 1.48, s                           | 1.48, s                            |
| 21   | 1.57, s                                                                                  | 1.57, s                           | 1.56, s                            |
| 22   | 1.70, s                                                                                  | 1.48, s                           | 1.48, s                            |
| 23   |                                                                                          |                                   |                                    |
| 24   | 1.62, s                                                                                  | 1.70, s                           | 1.70, s                            |
| 25   | 1.41, s                                                                                  | 1.41, s                           | 1.41, s                            |
| 3-OH | 12.9, br, s                                                                              | 12.91, br, s                      | 12.91, br, s                       |
| 5-OH |                                                                                          | 10.55, br, s                      | 10.55, br, s                       |

---

| No.  | <sup>13</sup> C NMR δ <sub>c</sub> [ppm] <i>d</i> <sub>6</sub> -DMSO |                                |                                    |
|------|----------------------------------------------------------------------|--------------------------------|------------------------------------|
|      | Natural<br>(150 MHz)                                                 | Synthetic (Ref.1)<br>(100 MHz) | Synthetic (This work)<br>(100 MHz) |
| 1    | 184.0                                                                | 184.1                          | 184.1                              |
| 2    | 106.4                                                                | 105.9                          | 105.9                              |
| 3    | 163.7                                                                | 163.4                          | 163.4                              |
| 4    | 101.9                                                                | 101.0                          | 101.0                              |
| 5    | 163.0                                                                | 163.3                          | 163.3                              |
| 6    | 104.4                                                                | 103.6                          | 103.6                              |
| 7    | 148.4                                                                | 147.7                          | 147.7                              |
| 8    | 60.7                                                                 | 60.1                           | 60.1                               |
| 9    | 52.5                                                                 | 52.0                           | 52.0                               |
| 10   | 98.6                                                                 | 97.9                           | 97.9                               |
| 11   | 174.0                                                                | 176.0                          | 176.0                              |
| 12   | 99.8                                                                 | 99.7                           | 99.7                               |
| 13   | 49.8                                                                 | 49.1                           | 49.1                               |
| 14   | 131.0                                                                | 130.6                          | 130.6                              |
| 15   | 35.3                                                                 | 34.4                           | 34.4                               |
| 16   | 42.9                                                                 | 43.2                           | 43.2                               |
| 17   | 22.6                                                                 | 21.9                           | 21.9                               |
| 18   | 124.5                                                                | 123.3                          | 123.3                              |
| 19   | 131.4                                                                | 131.3                          | 131.3                              |
| 20   | 18.1                                                                 | 17.4                           | 17.4                               |
| 21   | 25.6                                                                 | 25.4                           | 25.4                               |
| 22   | 21.9                                                                 | 21.3                           | 21.3                               |
| 23   | 126.2                                                                | 125.5                          | 125.5                              |
| 24   | 17.0                                                                 | 21.3                           | 21.3                               |
| 25   | 22.6                                                                 | 22.1                           | 22.1                               |
| 3-OH |                                                                      |                                |                                    |
| 5-OH |                                                                      |                                |                                    |

---

## II: NMR Spectrum

$^1\text{H}$ -NMR spectrum for **9** ( $\text{CDCl}_3$ , 400 MHz)

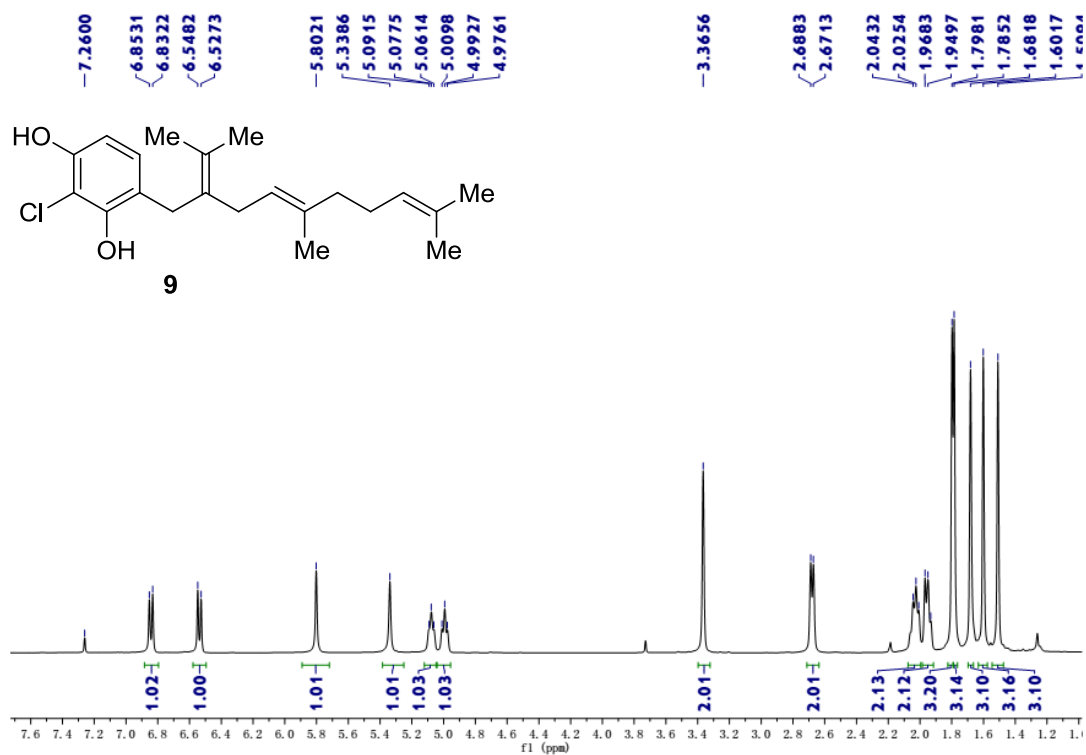

$^{13}\text{C}$ -NMR spectrum for **9** ( $\text{CDCl}_3$ , 100 MHz)

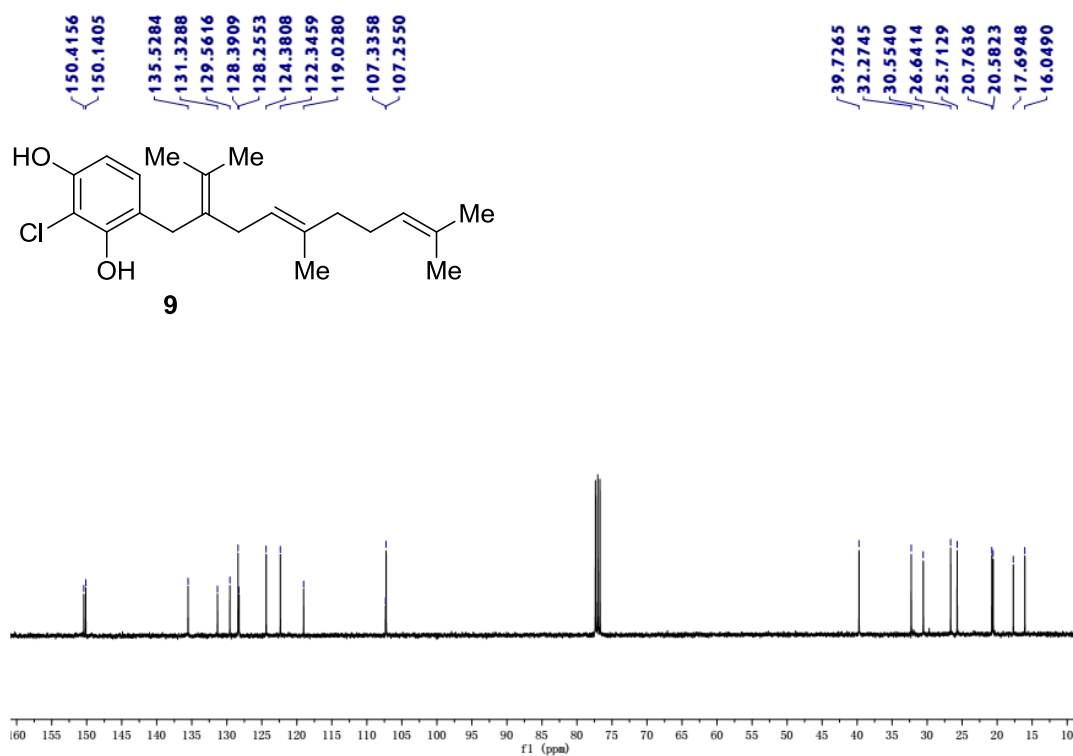

<sup>1</sup>H-NMR spectrum for **7** (CDCl<sub>3</sub>, 400 MHz)

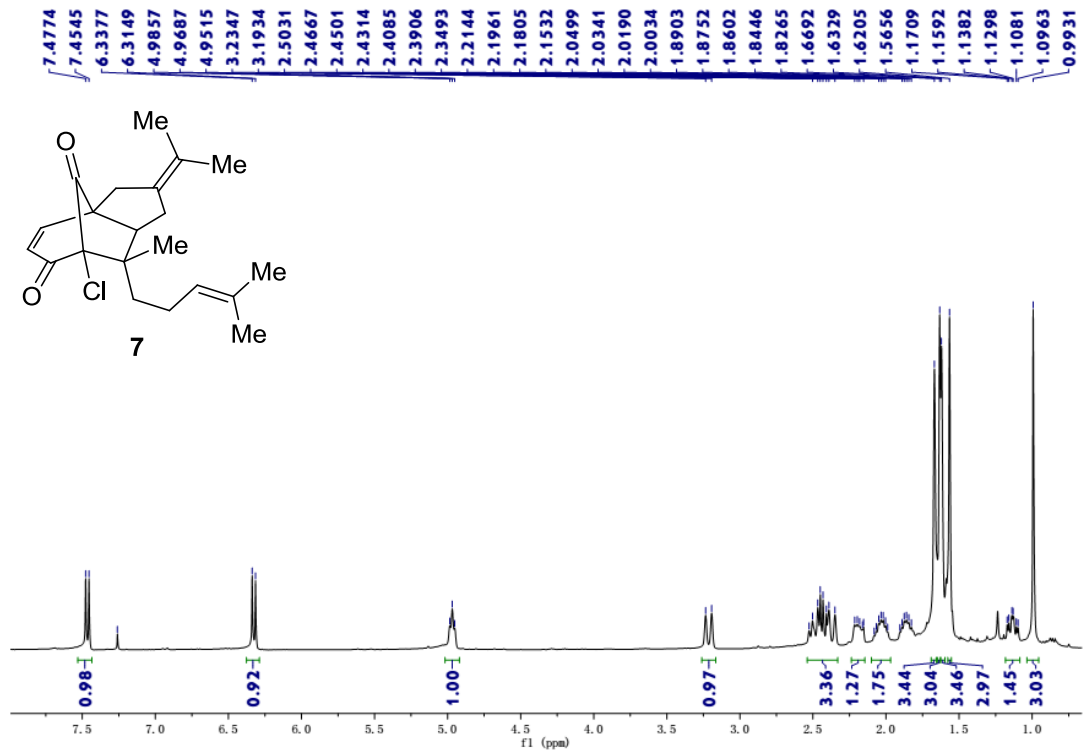

<sup>13</sup>C-NMR spectrum for **7** (CDCl<sub>3</sub>, 100 MHz)

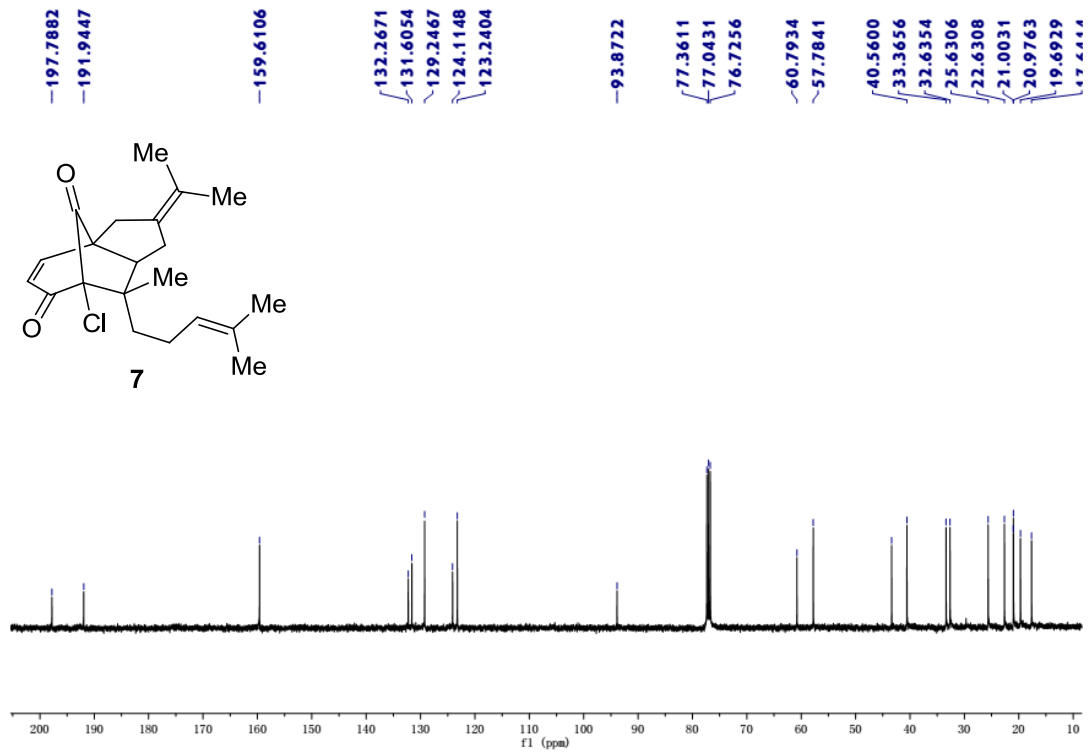

<sup>1</sup>H-NMR spectrum for **8** (CDCl<sub>3</sub>, 400 MHz)

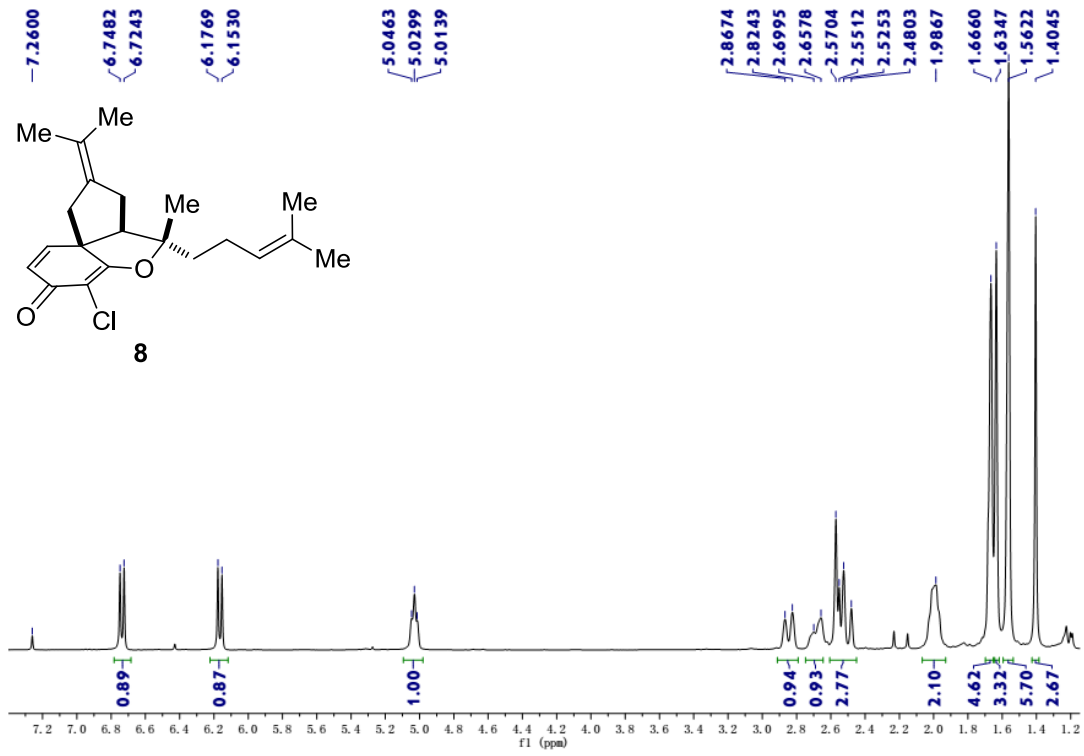

<sup>13</sup>C-NMR spectrum for **8** (CDCl<sub>3</sub>, 100 MHz)

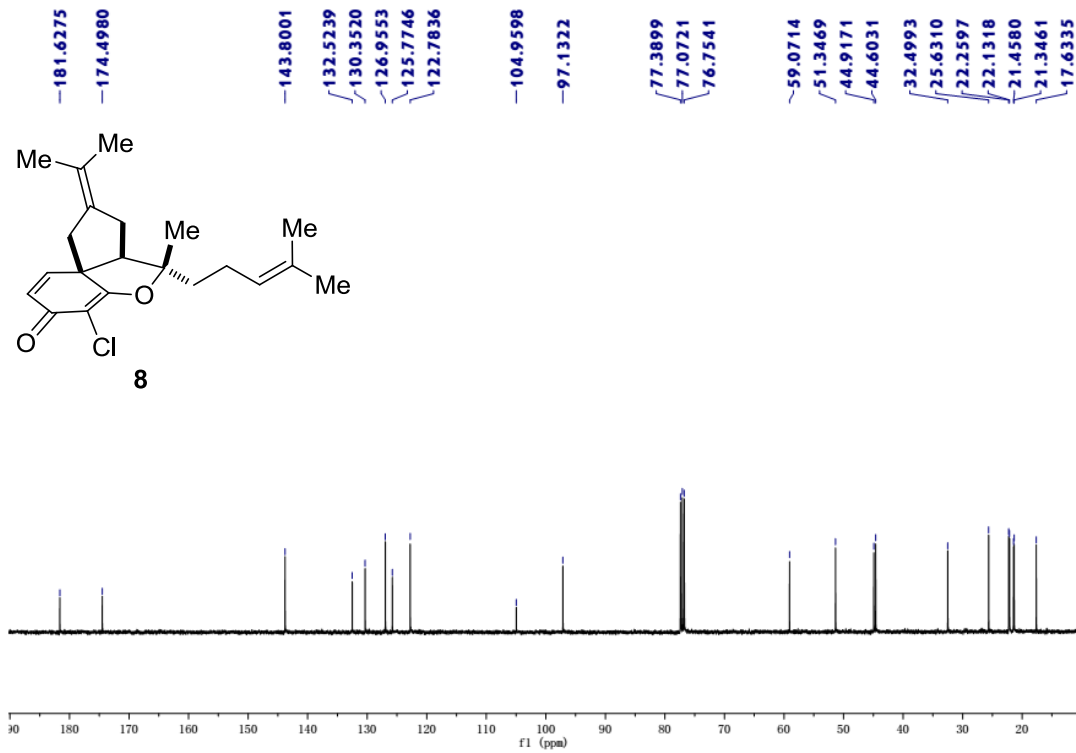



<sup>1</sup>H-NMR spectrum for **15** (CDCl<sub>3</sub>, 400 MHz)

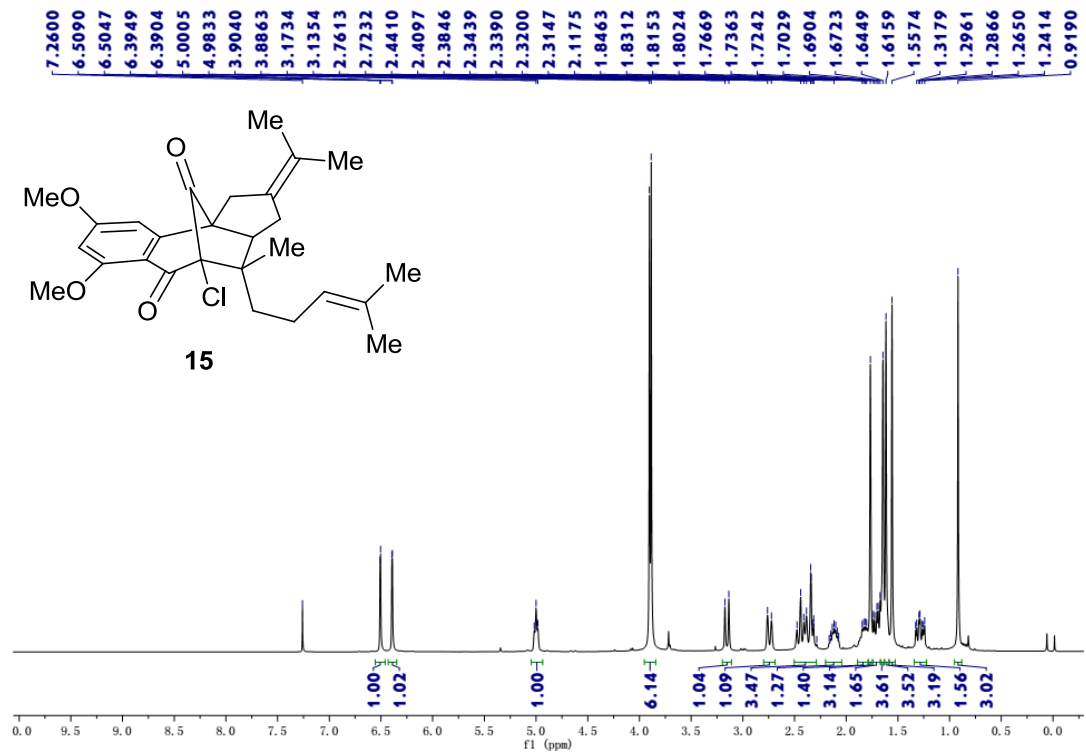

<sup>13</sup>C-NMR spectrum for **15** (CDCl<sub>3</sub>, 100 MHz)

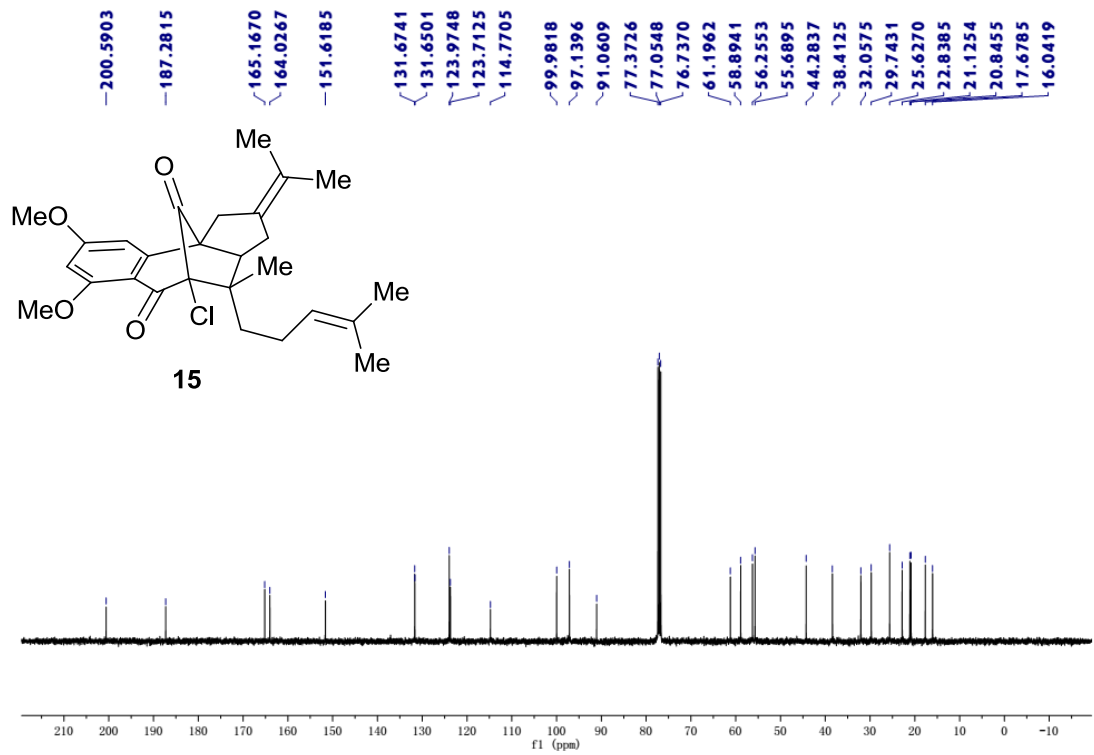

<sup>1</sup>H-NMR spectrum for **16** (CDCl<sub>3</sub>, 400 MHz)

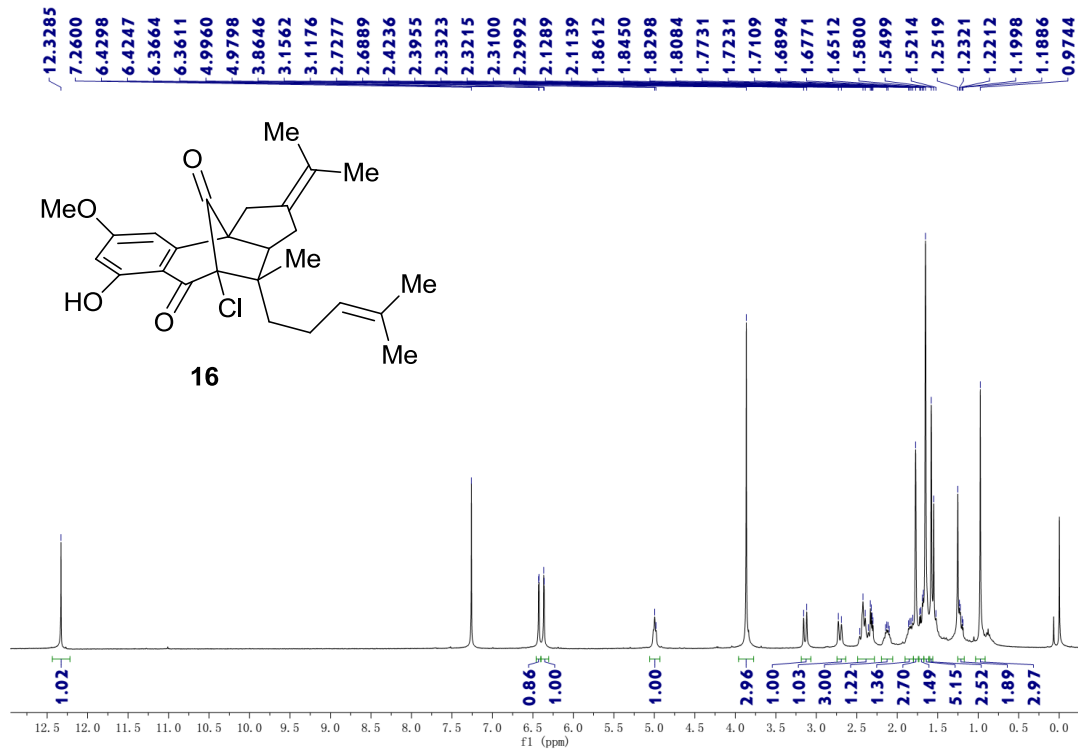

<sup>13</sup>C-NMR spectrum for **16** (CDCl<sub>3</sub>, 100 MHz)

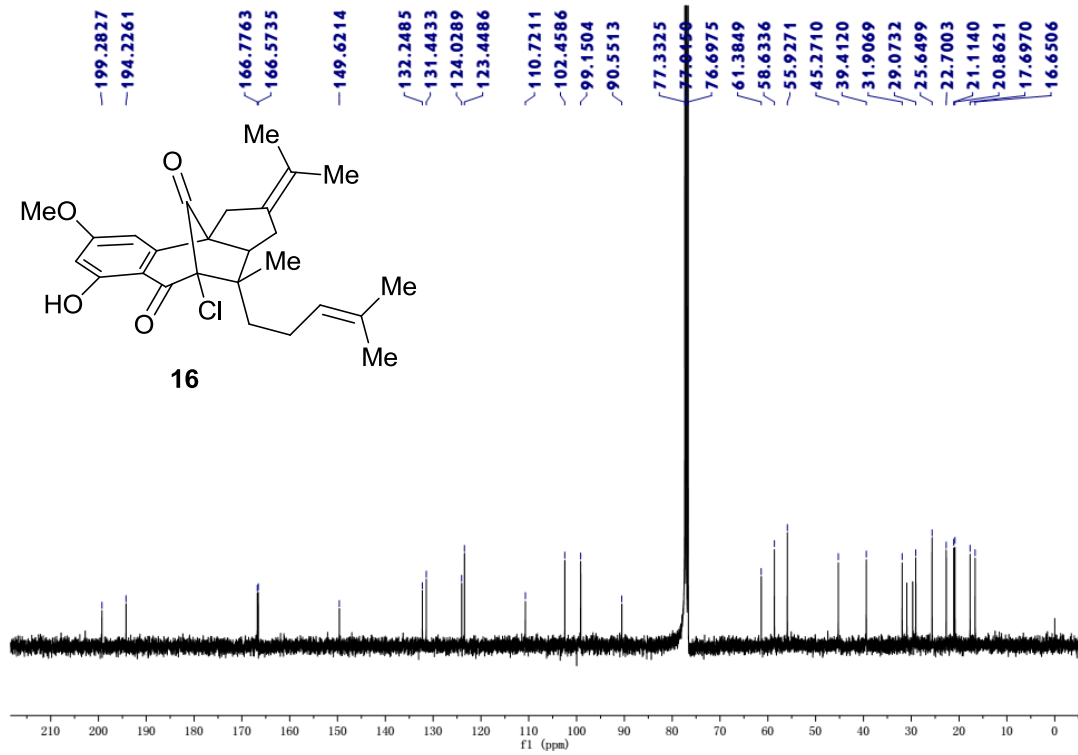

<sup>1</sup>H-NMR spectrum for **1** (CDCl<sub>3</sub>, 400 MHz)

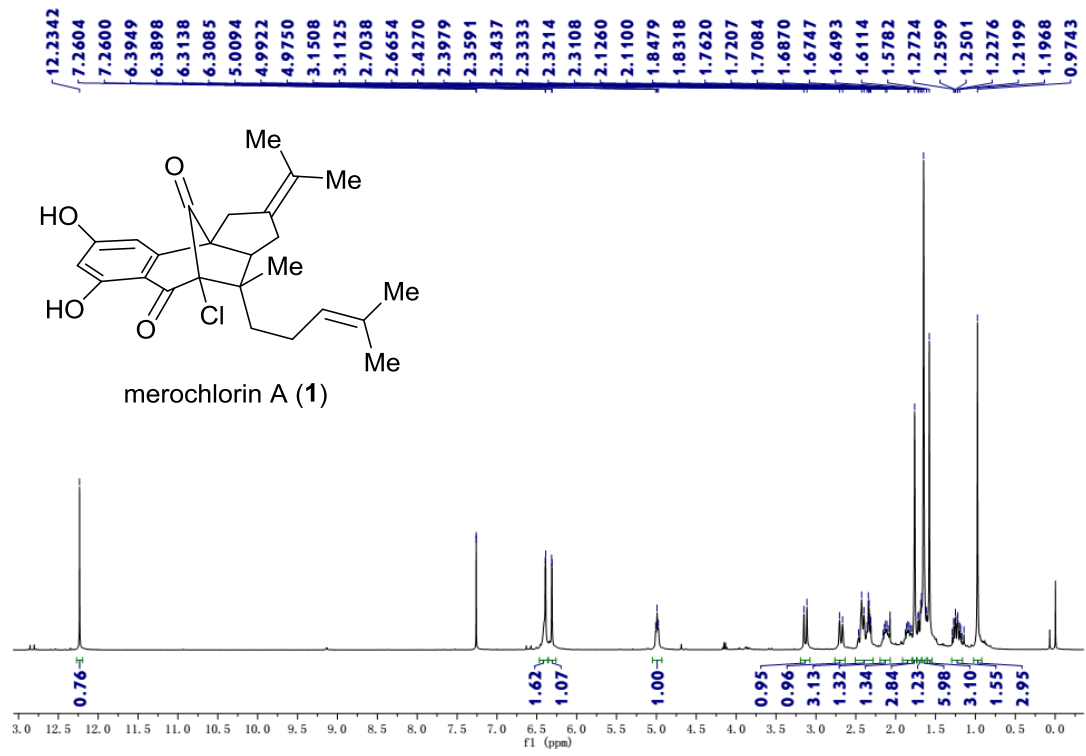

<sup>13</sup>C-NMR spectrum for **1** (CDCl<sub>3</sub>, 100 MHz)

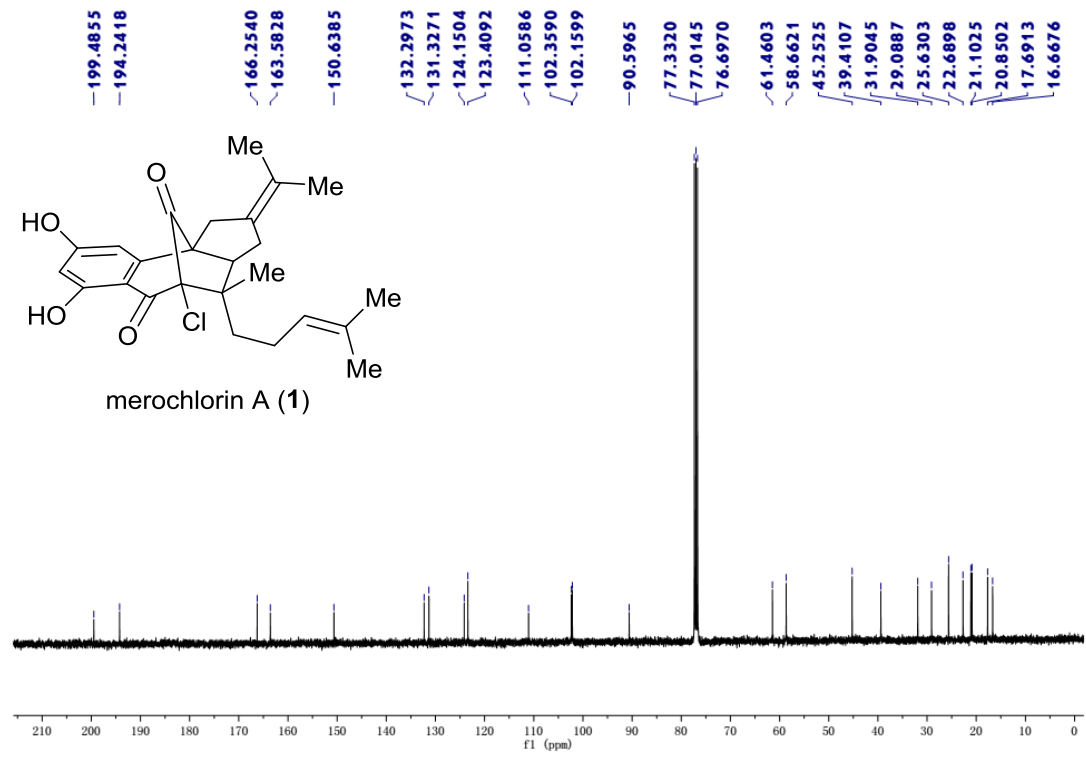

$^1\text{H-NMR}$  spectrum for **1** ( $d_6$ -DMSO, 400 MHz)

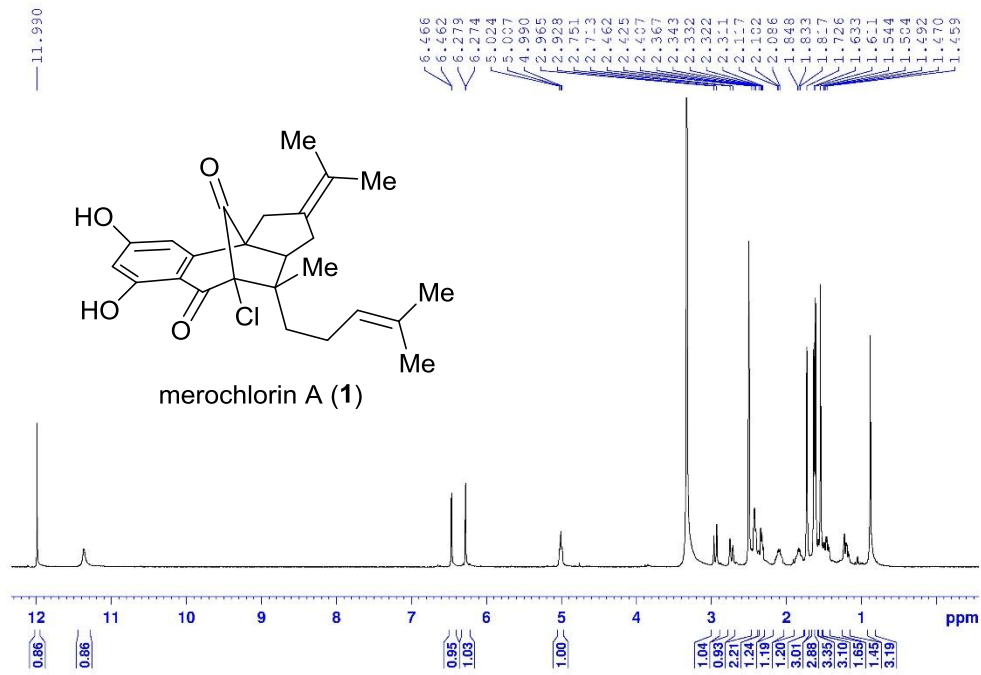

$^{13}\text{C-NMR}$  spectrum for **1** ( $d_6$ -DMSO, 100 MHz)

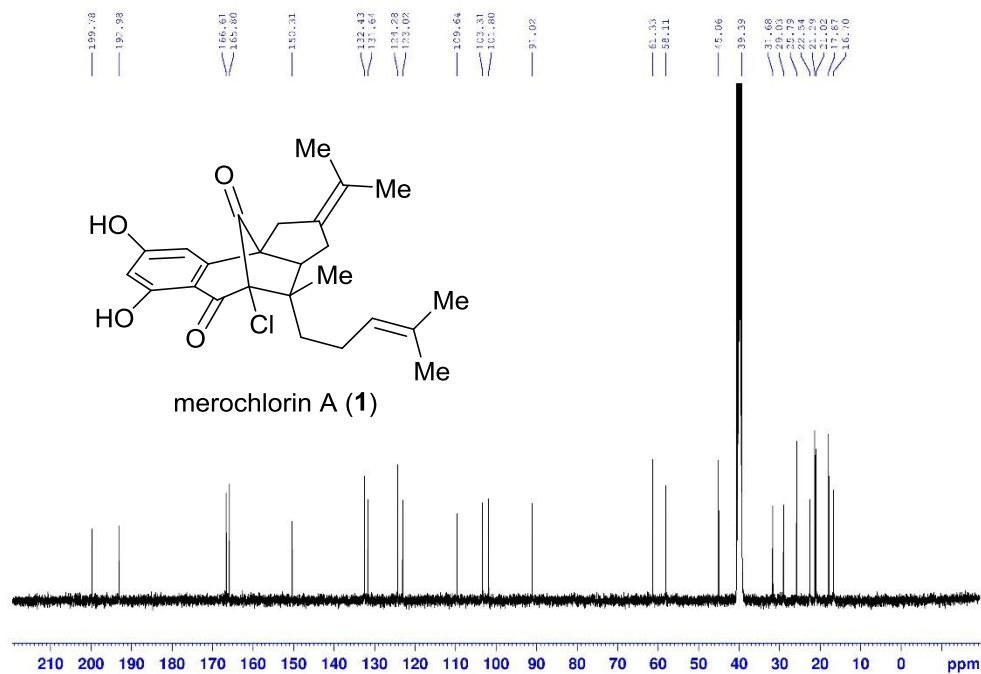

<sup>1</sup>H-NMR spectrum for **18** (CDCl<sub>3</sub>, 400 MHz)

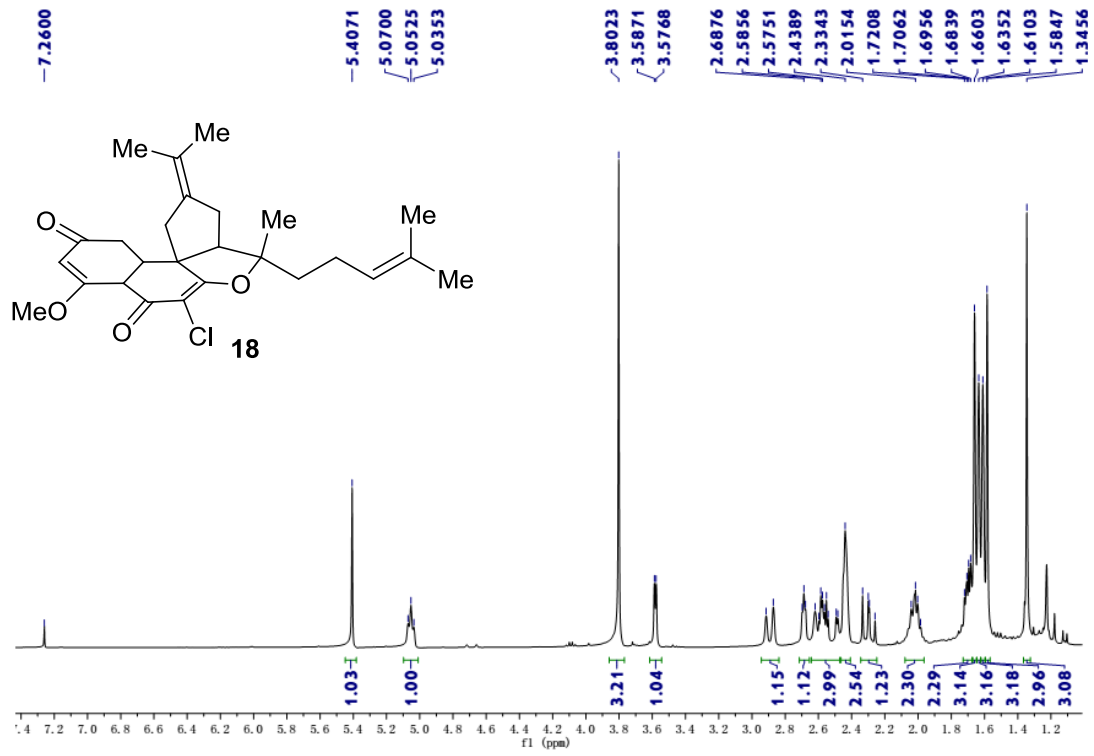

<sup>13</sup>C-NMR spectrum for **18** (CDCl<sub>3</sub>, 100 MHz)

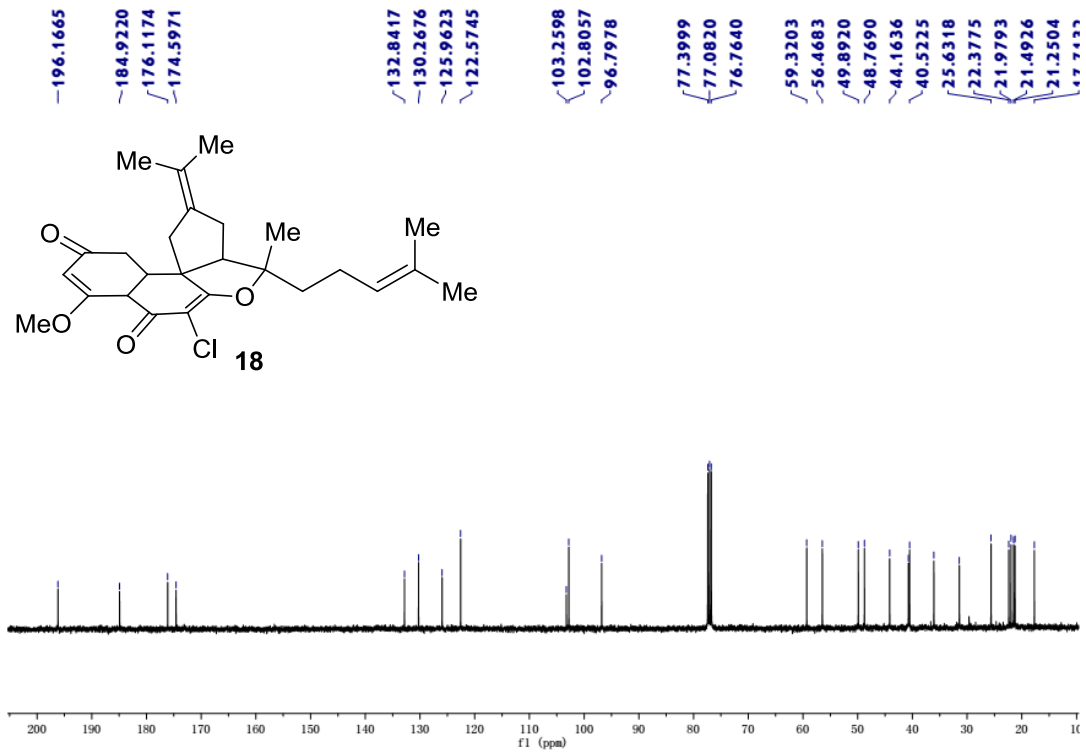

<sup>1</sup>H-NMR spectrum for **19** (CDCl<sub>3</sub>, 400 MHz)

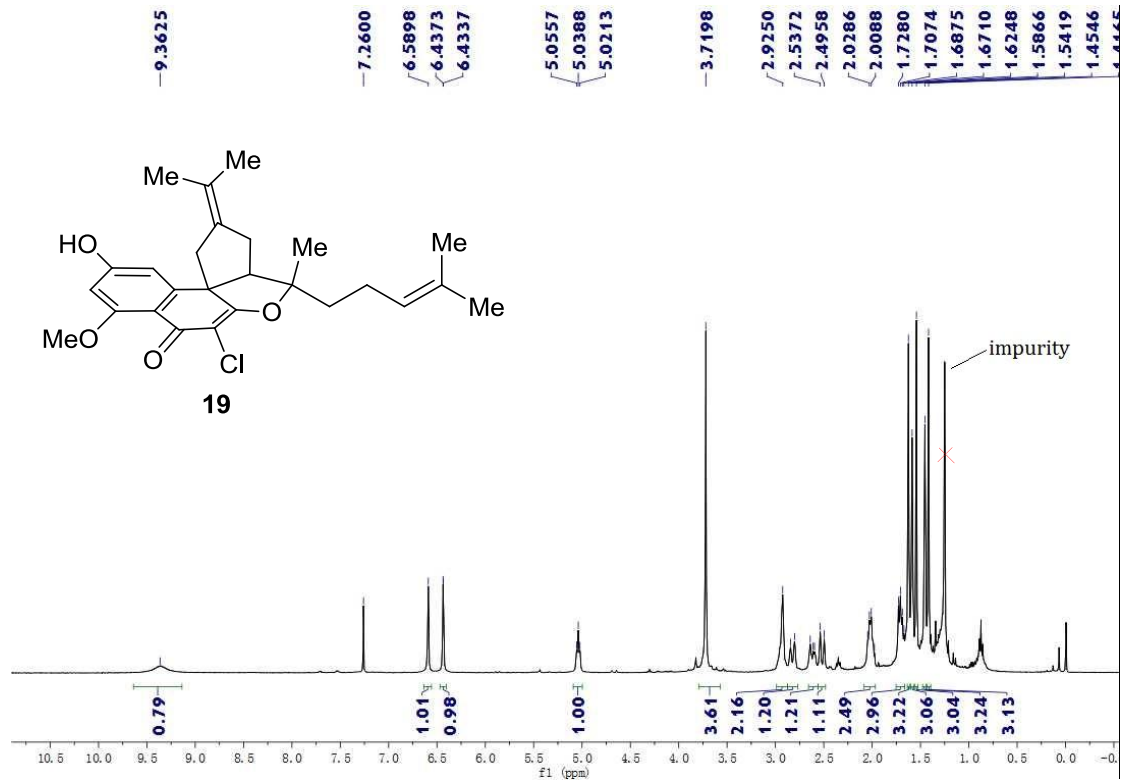

<sup>13</sup>C-NMR spectrum for **19** (CDCl<sub>3</sub>, 100 MHz)

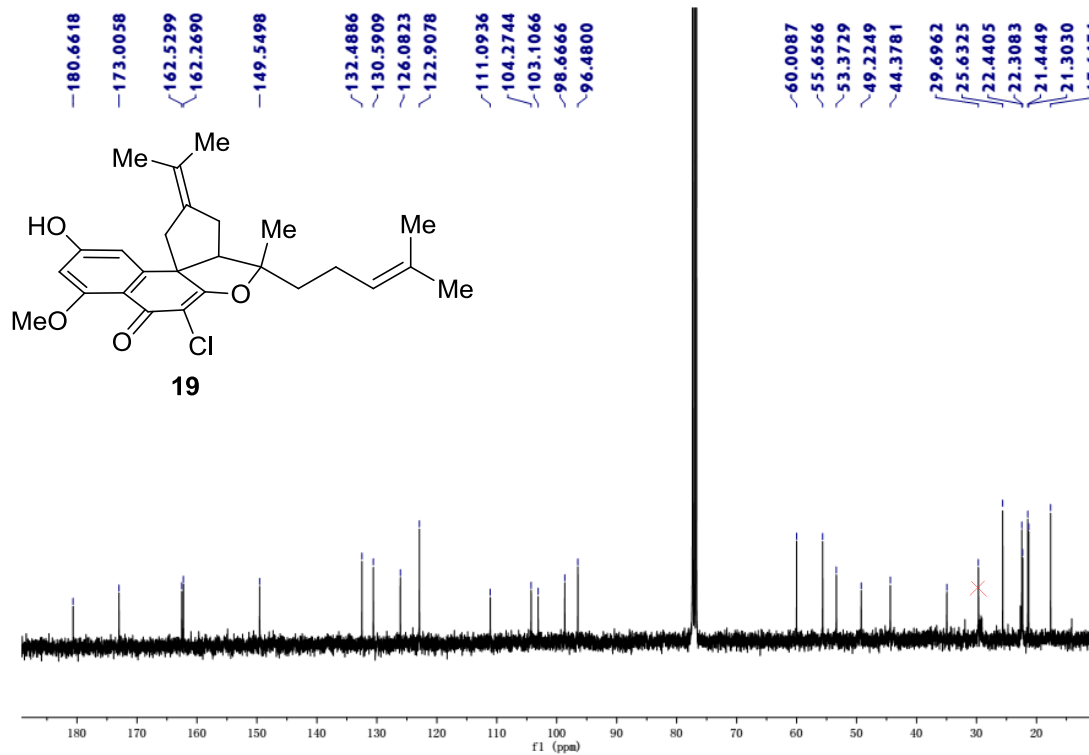

<sup>1</sup>H-NMR spectrum for **2** (CDCl<sub>3</sub>, 400 MHz)

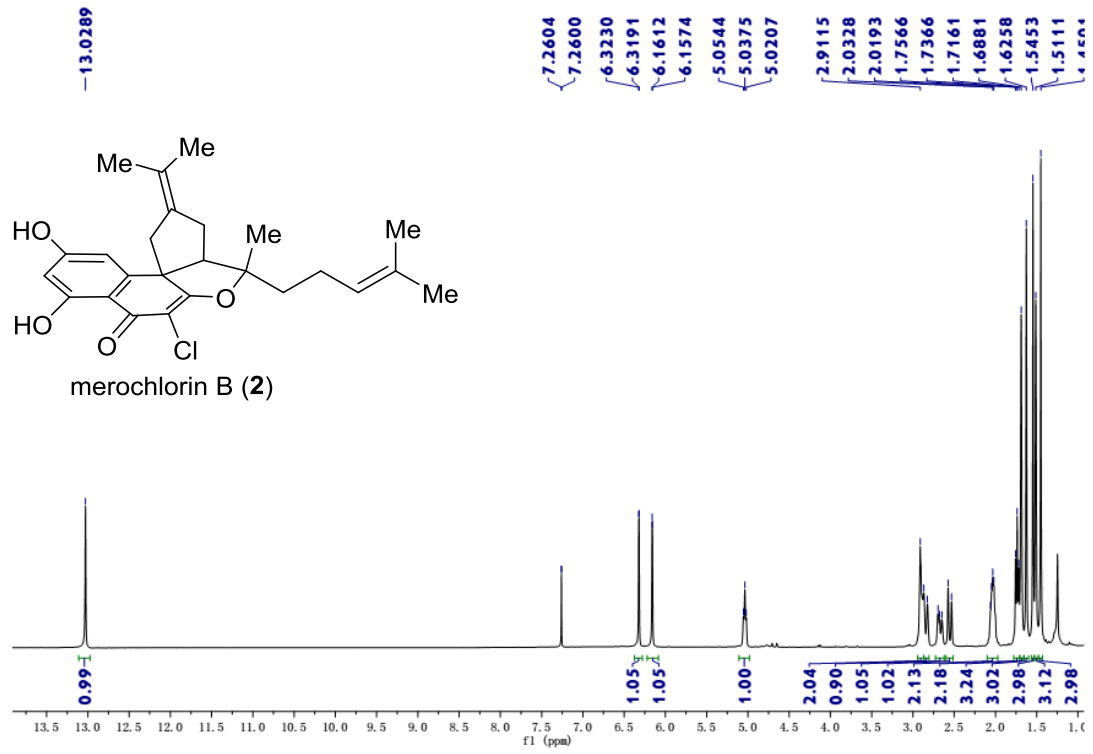

<sup>13</sup>C-NMR spectrum for **2** (CDCl<sub>3</sub>, 100 MHz)

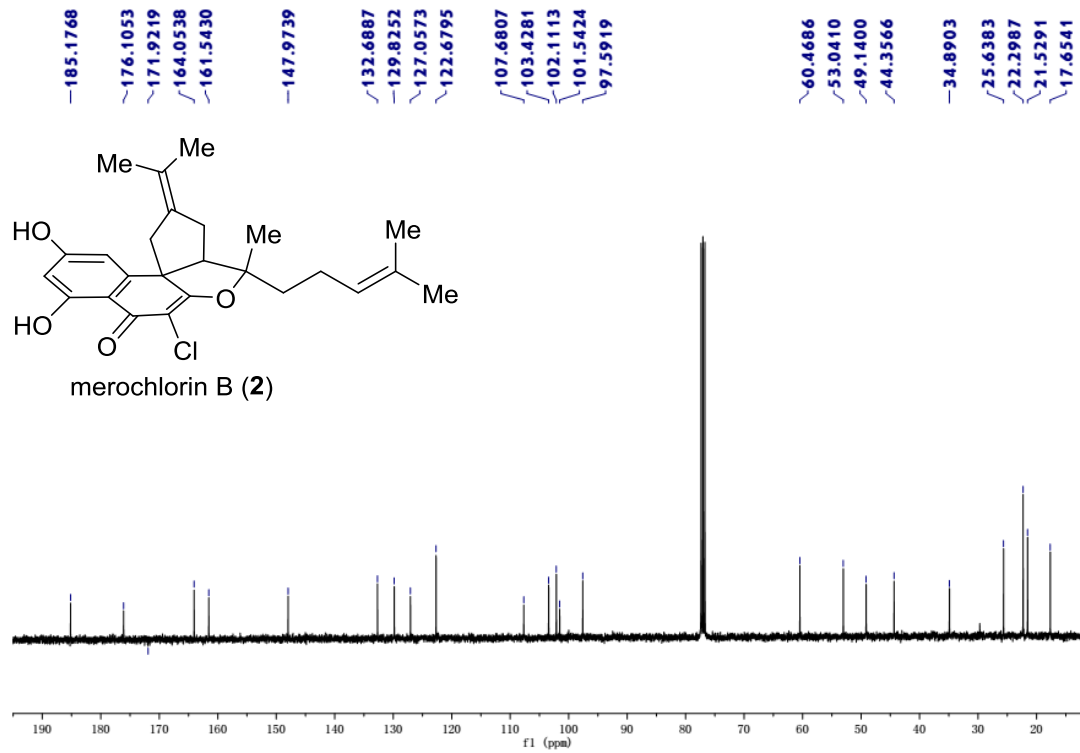

<sup>1</sup>H-NMR spectrum for **2** (*d*<sub>6</sub>-DMSO, 400 MHz)

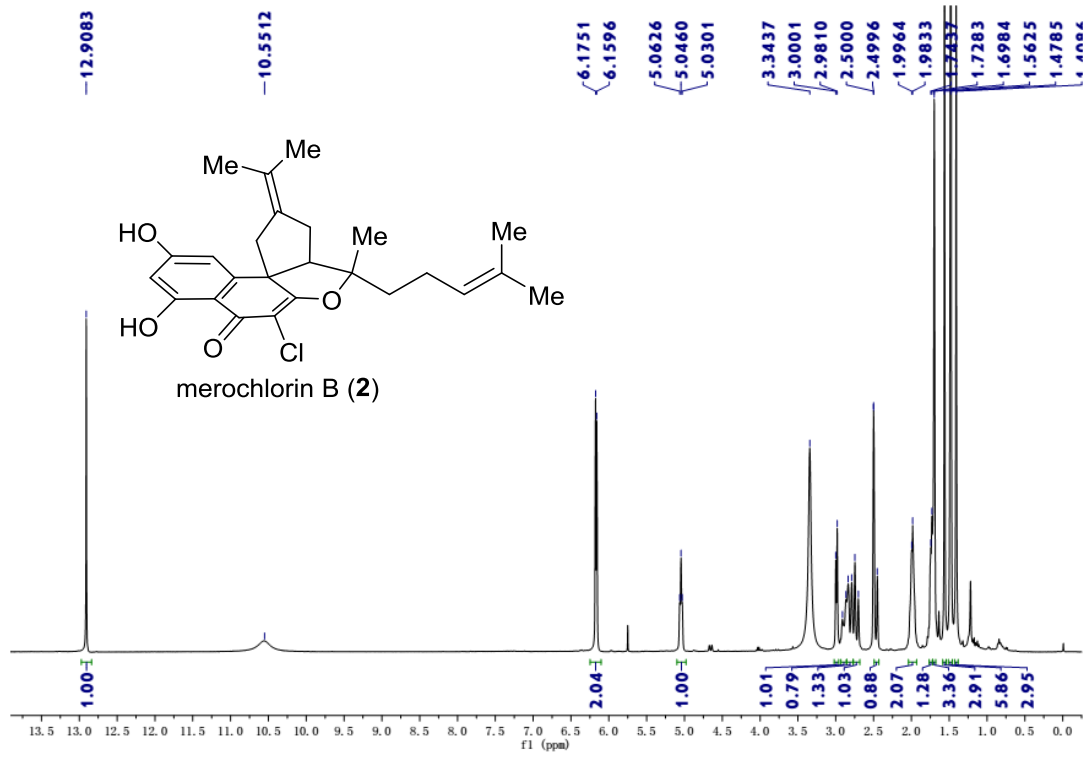

<sup>13</sup>C-NMR spectrum for **2** (*d*<sub>6</sub>-DMSO, 100 MHz)

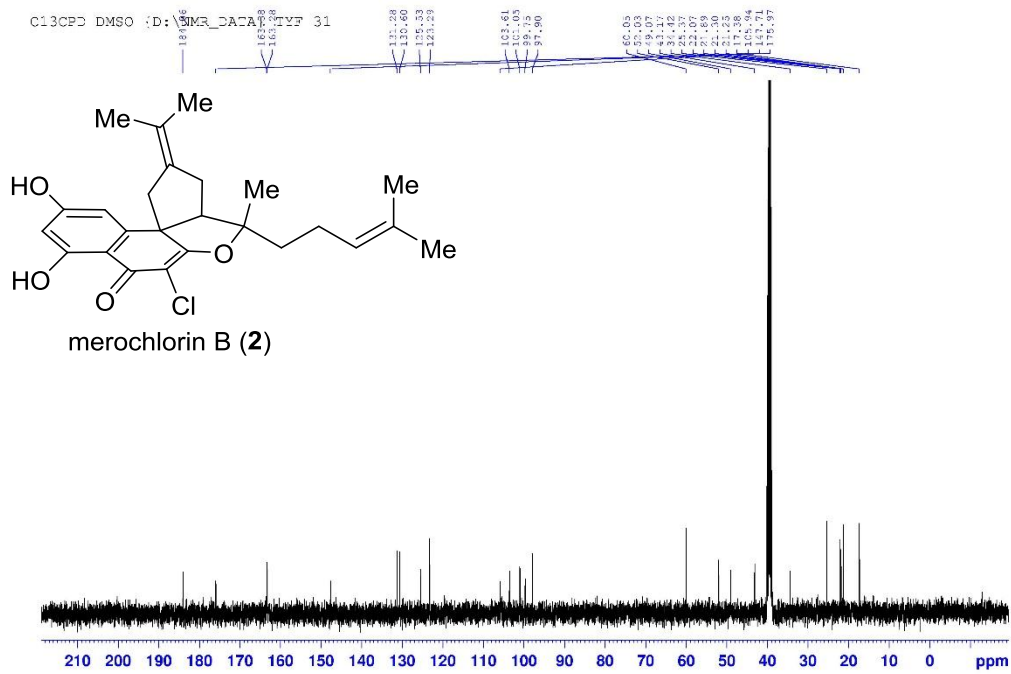



### III: X-ray Crystallographic Study

#### 1) X-ray Crystallographic Study for **8**

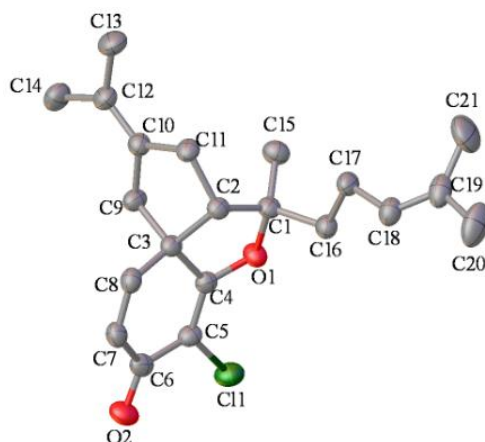

**Figure S-1.** X-ray structure of **8**

**Table S-1.** Details crystallographic data for **8**

| Compound                                                     | <b>8</b>                                         |
|--------------------------------------------------------------|--------------------------------------------------|
| formula                                                      | C <sub>21</sub> H <sub>27</sub> ClO <sub>2</sub> |
| FW                                                           | 346.88                                           |
| crystal system                                               | triclinic                                        |
| space group                                                  | <i>P</i> -1                                      |
| <i>a</i> /Å                                                  | 9.418(2)                                         |
| <i>b</i> /Å                                                  | 10.301(3)                                        |
| <i>c</i> /Å                                                  | 10.919(3)                                        |
| $\alpha$ /deg                                                | 75.398(15)                                       |
| $\beta$ /deg                                                 | 77.071(16)                                       |
| $\gamma$ /deg                                                | 72.538(15)                                       |
| <i>V</i> /Å <sup>3</sup>                                     | 965.1(5)                                         |
| <i>Z</i>                                                     | 2                                                |
| <i>D<sub>c</sub></i> /g cm <sup>-3</sup>                     | 1.194                                            |
| $\mu$ /mm <sup>-1</sup>                                      | 0.208                                            |
| <i>R</i> <sub>1</sub> <sup>a</sup> ( <i>I</i> > 2 $\sigma$ ) | 0.0654                                           |
| w <i>R</i> <sub>2</sub> <sup>b</sup> (all data)              | 0.1530                                           |
| GOF                                                          | 1.143                                            |

## 2) X-ray Crystallographic Study for 18

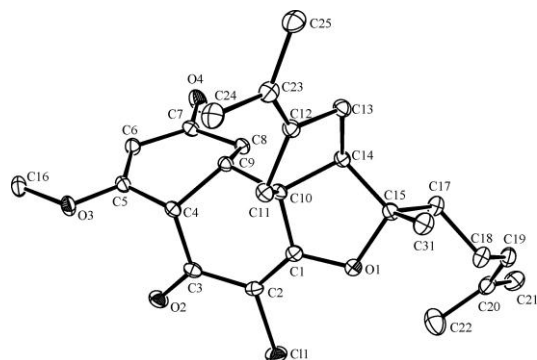

Figure S-2. X-ray structure of 18

Table S-2. Details crystallographic data for 18

| Compound                                            | 18                                               |
|-----------------------------------------------------|--------------------------------------------------|
| formula                                             | C <sub>26</sub> H <sub>33</sub> ClO <sub>4</sub> |
| FW                                                  | 444.97                                           |
| crystal system                                      | monoclinic                                       |
| space group                                         | P 1 21/c 1                                       |
| <i>a</i> /Å                                         | 12.8200(5)                                       |
| <i>b</i> /Å                                         | 14.6670(7)                                       |
| <i>c</i> /Å                                         | 12.6709(7)                                       |
| <i>α</i> /deg                                       | 90                                               |
| <i>β</i> /deg                                       | 101.774(5)                                       |
| <i>γ</i> /deg                                       | 90                                               |
| <i>V</i> /Å <sup>3</sup>                            | 2332.4(2)                                        |
| <i>Z</i>                                            | 4                                                |
| <i>D<sub>c</sub></i> /g cm <sup>-3</sup>            | 1.267                                            |
| <i>μ</i> /mm <sup>-1</sup>                          | 0.193                                            |
| <i>R</i> <sub>1</sub> <sup>a</sup> ( <i>I</i> > 2σ) | 0.0488                                           |
| w <i>R</i> <sub>2</sub> <sup>b</sup> (all data)     | 0.1114                                           |
| GOF                                                 | 1.030                                            |
